# Supplementary material for: Star polymerization of norbornene derivatives using a tri-functionalized Blechert's olefin metathesis catalyst
Source: Royal Society of Chemistry journal article supplement (doi:10.1039/c9py01905g), 2020-01-01
Supplement: c9py01905g1.pdf [file c9py01905g1.pdf]

## Supporting Information

### **Star Polymerization of Norbornene Derivatives Using Tri-functionalized Blechert's Olefin Metathesis Catalyst**

Chulu Zhou<sup>[a],[b]</sup>, Cuiping Hou<sup>[a],[c]</sup> and Jianhua Cheng<sup>\*[a],[b]</sup>

[a] State Key Laboratory of Polymer Physics and Chemistry  
Changchun Institute of Applied Chemistry  
Chinese Academy of Sciences  
No. 5625, Renmin Street, Changchun 130022 (China)  
E-Mail: jhcheng@ciac.ac.cn

[b] University of Science and Technology of China  
Hefei, Anhui 230029 (China)

[c] University of the Chinese Academy of Sciences,  
Changchun Branch, Changchun 130022 (China)

---

## **Contents**

|                                                     | <b>Page</b> |
|-----------------------------------------------------|-------------|
| 1. The route to the synthesis of catalyst <b>IV</b> | S3          |
| 2. Selected NMR spectra                             | S4          |
| 3. MALDI-TOF spectra of complex <b>F</b>            | S11         |
| 4. GPC and NMR characterization of polymers         | S12         |

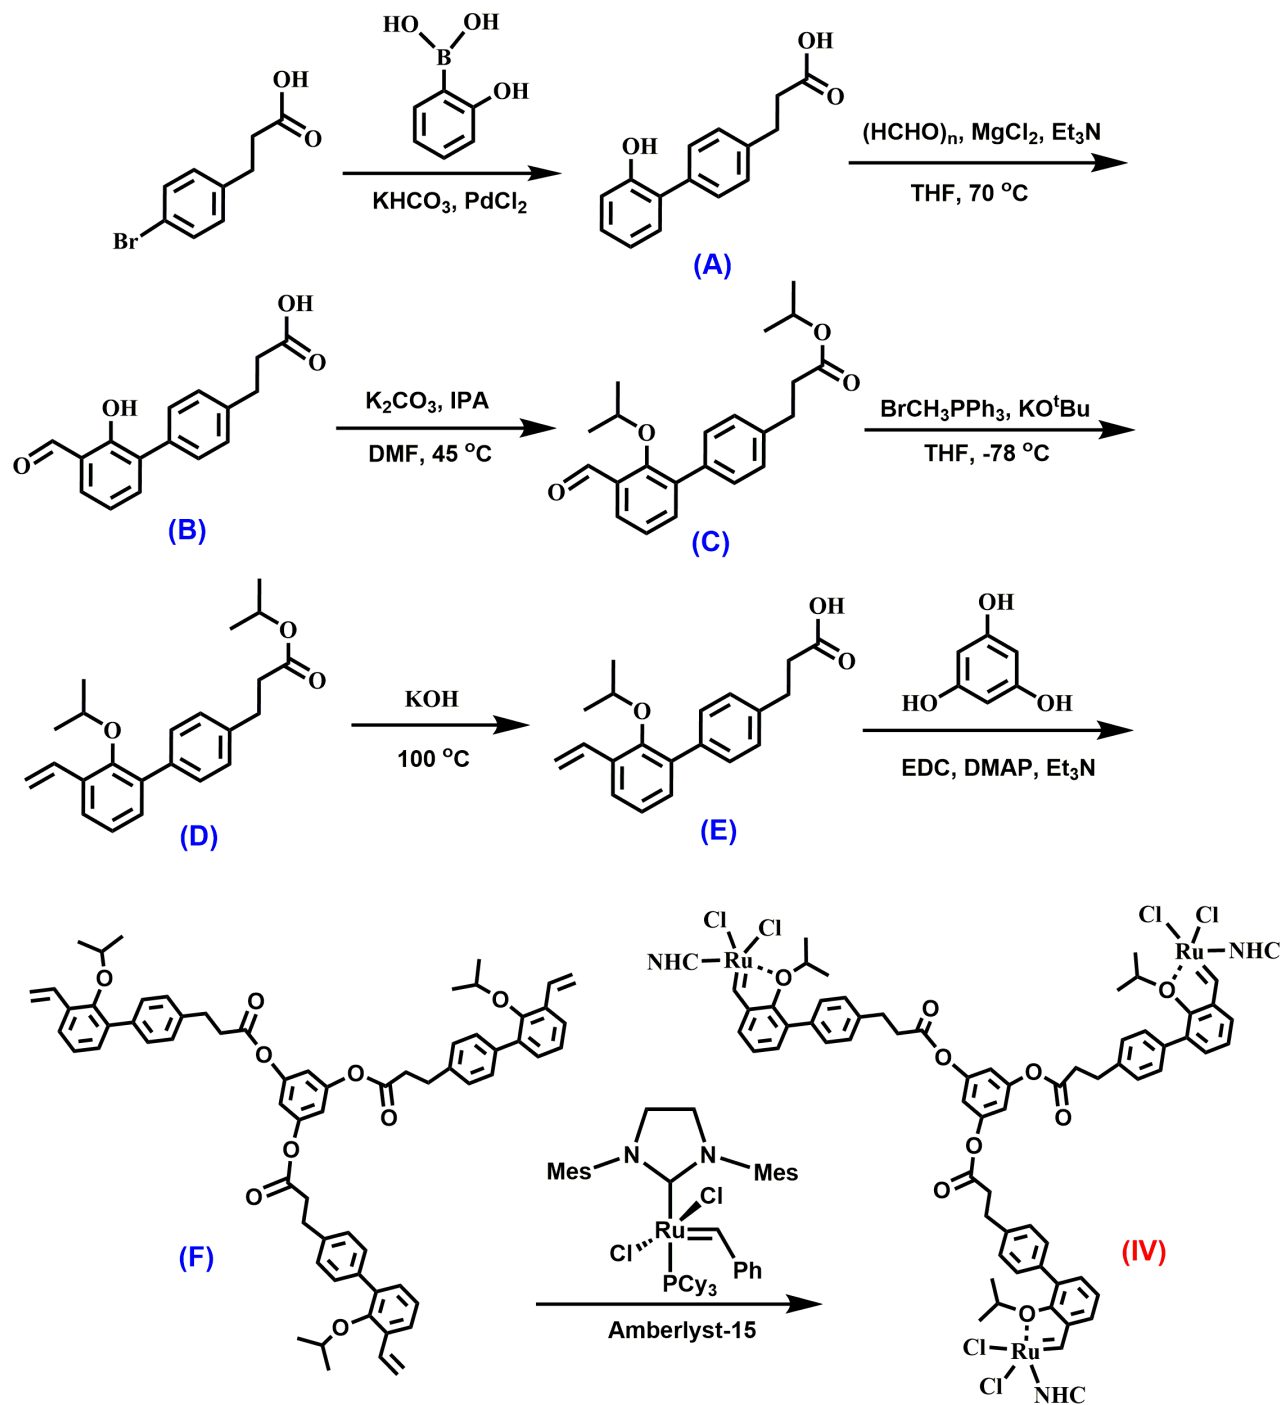

**Scheme S1.** The route to the synthesis of star-type trinuclear Ru catalyst (IV).

## 2. $^1\text{H}$ and $^{13}\text{C}\{^1\text{H}\}$ NMR spectra of complexes A-F and IV

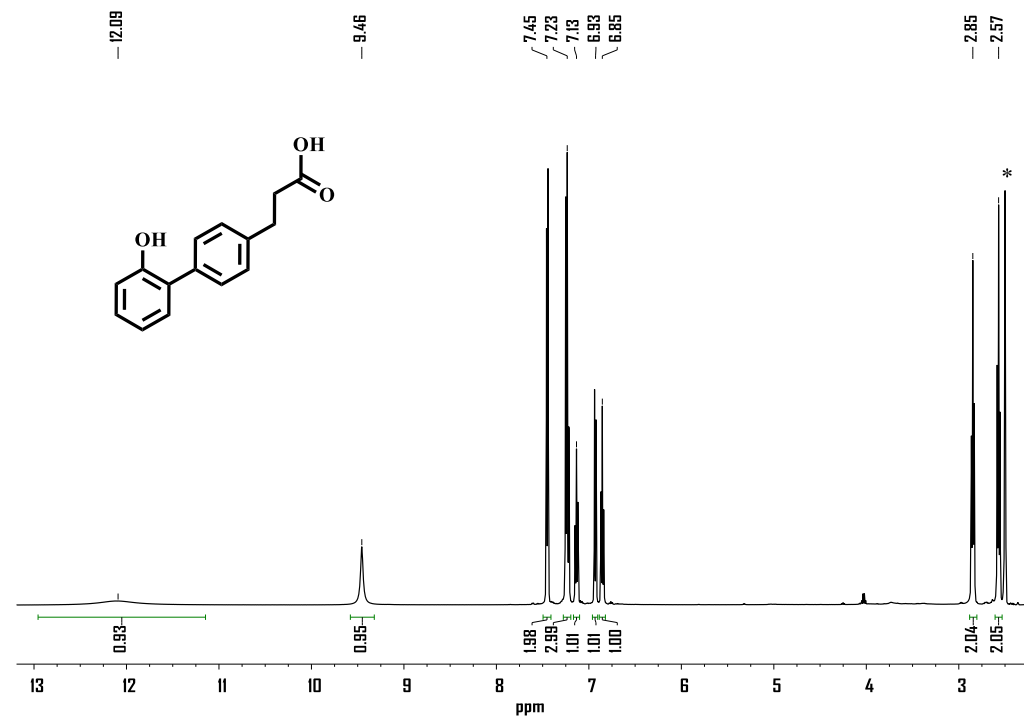

Figure S1.  $^1\text{H}$  NMR spectrum (500 MHz) of complex A in  $\text{DMSO-}d_6$  (\*) at 25 °C.

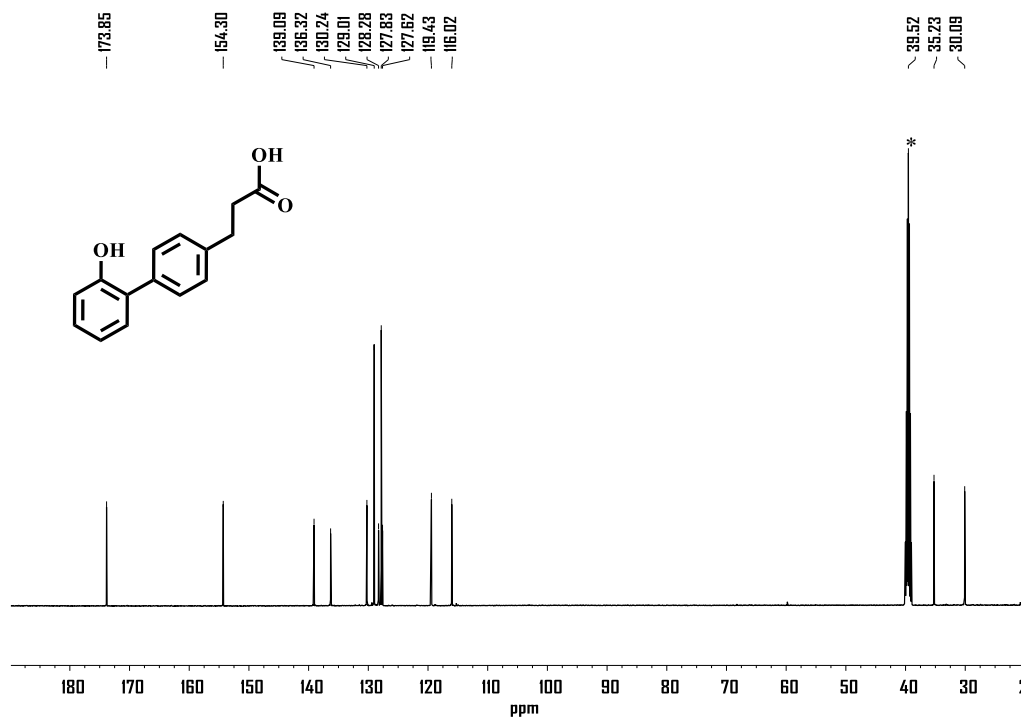

Figure S2.  $^{13}\text{C}\{^1\text{H}\}$  NMR spectrum (125 MHz) of complex A in  $\text{DMSO-}d_6$  (\*) at 25 °C.

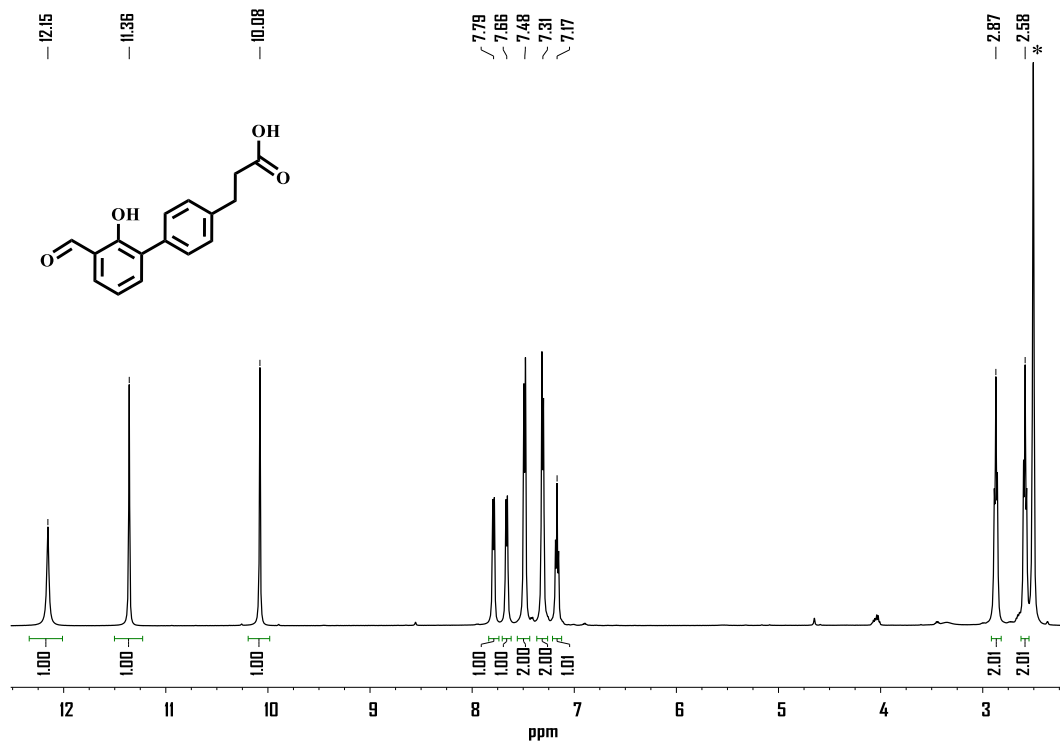

**Figure S3.** <sup>1</sup>H NMR spectrum (500 MHz) of complex **B** in DMSO-*d*<sub>6</sub>(\*) at 25 °C.

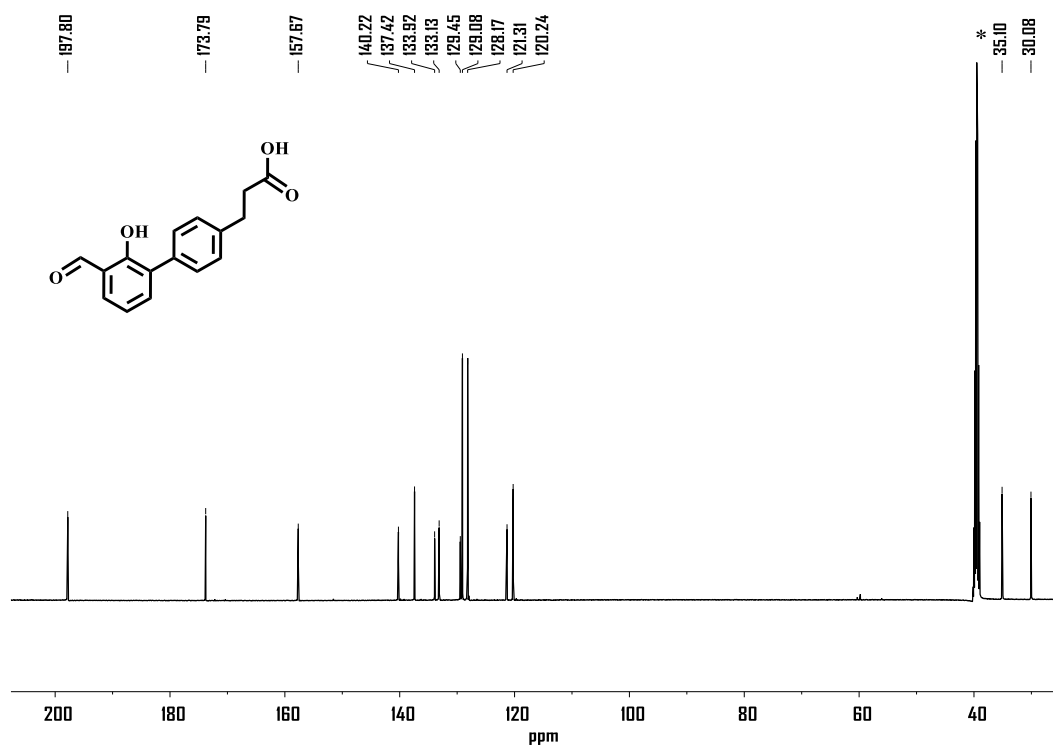

**Figure S4.** <sup>13</sup>C{<sup>1</sup>H} NMR spectrum (125 MHz) of complex **B** in DMSO-*d*<sub>6</sub>(\*) at 25 °C.

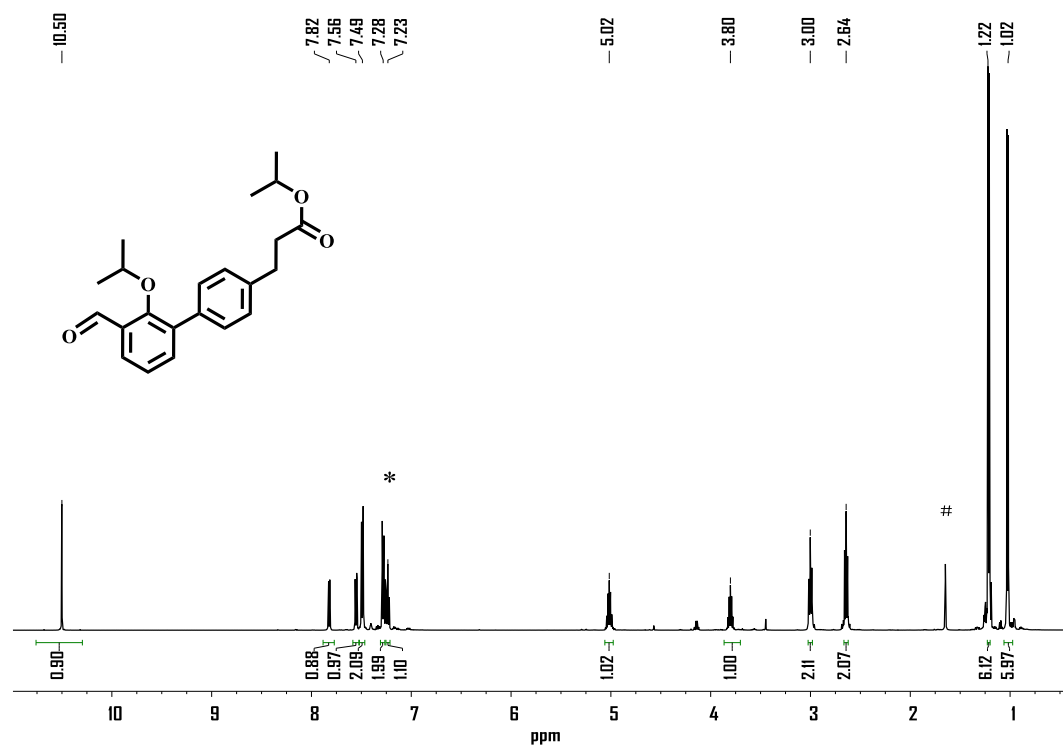

**Figure S5.** <sup>1</sup>H NMR spectrum (500 MHz) of complex C in CDCl<sub>3</sub> (\*) at 25 °C. (#H<sub>2</sub>O)

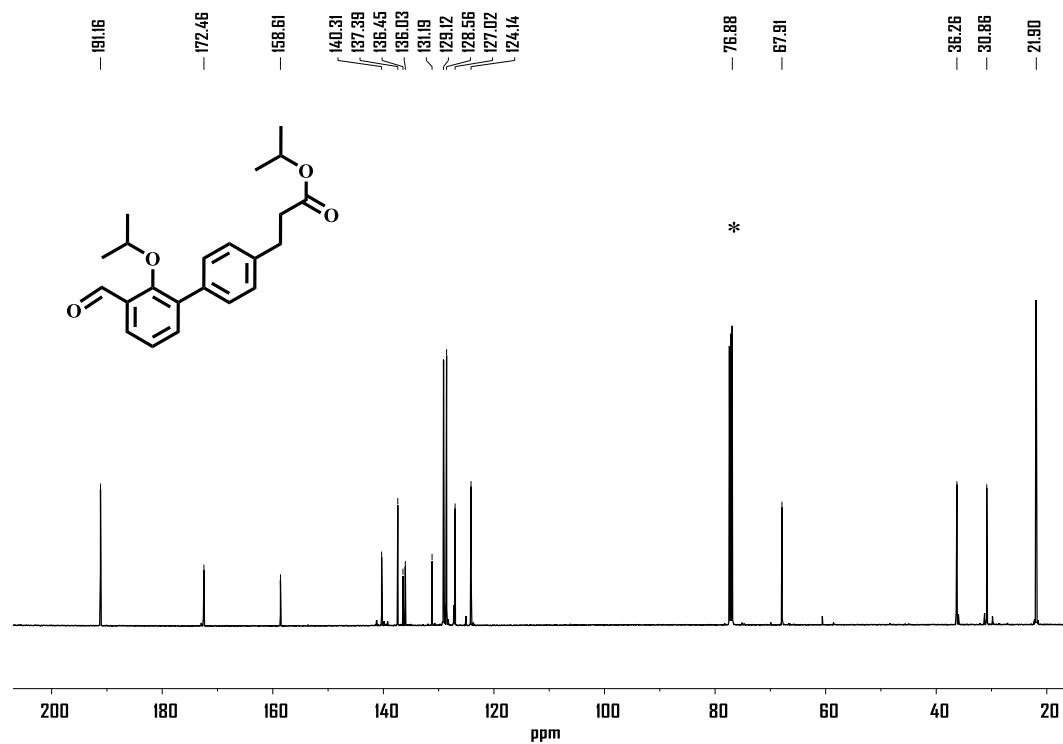

**Figure S6.** <sup>13</sup>C{<sup>1</sup>H} NMR spectrum (125 MHz) of complex C in CDCl<sub>3</sub> (\*) at 25 °C.

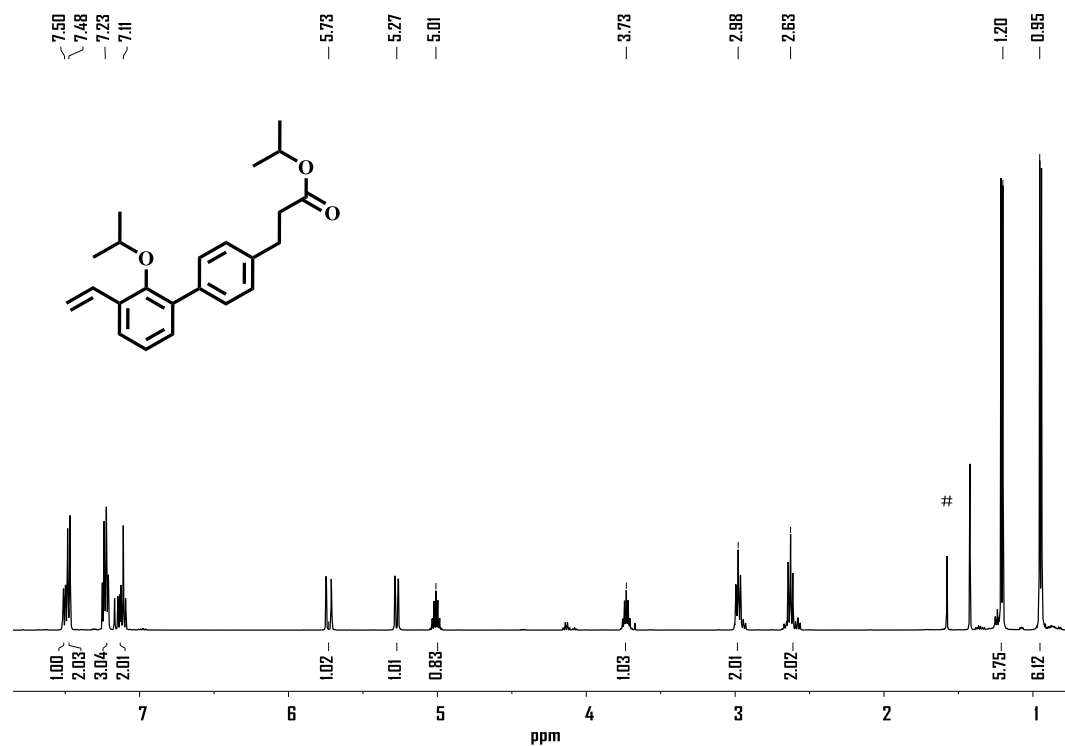

**Figure S7.**  $^1\text{H}$  NMR spectrum (500 MHz) of complex **D** in  $\text{CDCl}_3$  (\*) at 25 °C. (# $\text{H}_2\text{O}$ )

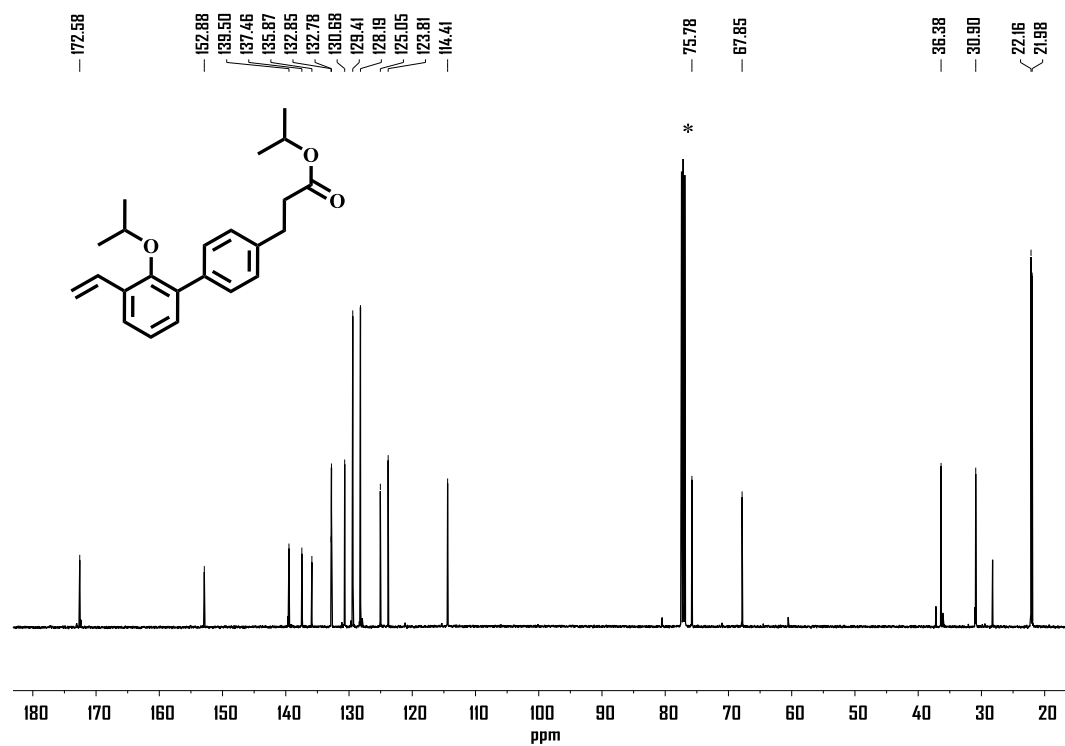

**Figure S8.**  $^{13}\text{C}\{^1\text{H}\}$  NMR spectrum (125 MHz) of complex **D** in  $\text{CDCl}_3$  (\*) at 25 °C.

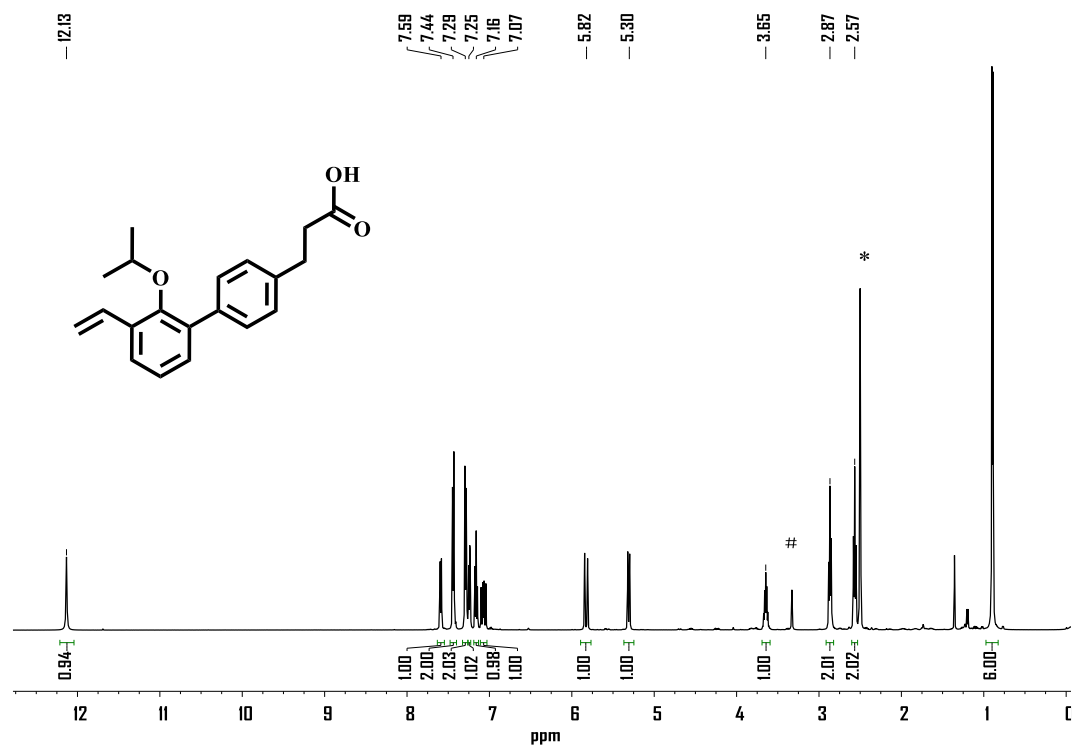

**Figure S9.** <sup>1</sup>H NMR spectrum (500 MHz) of complex E in DMSO-*d*<sub>6</sub> (\*) at 25 °C. (\*H<sub>2</sub>O)

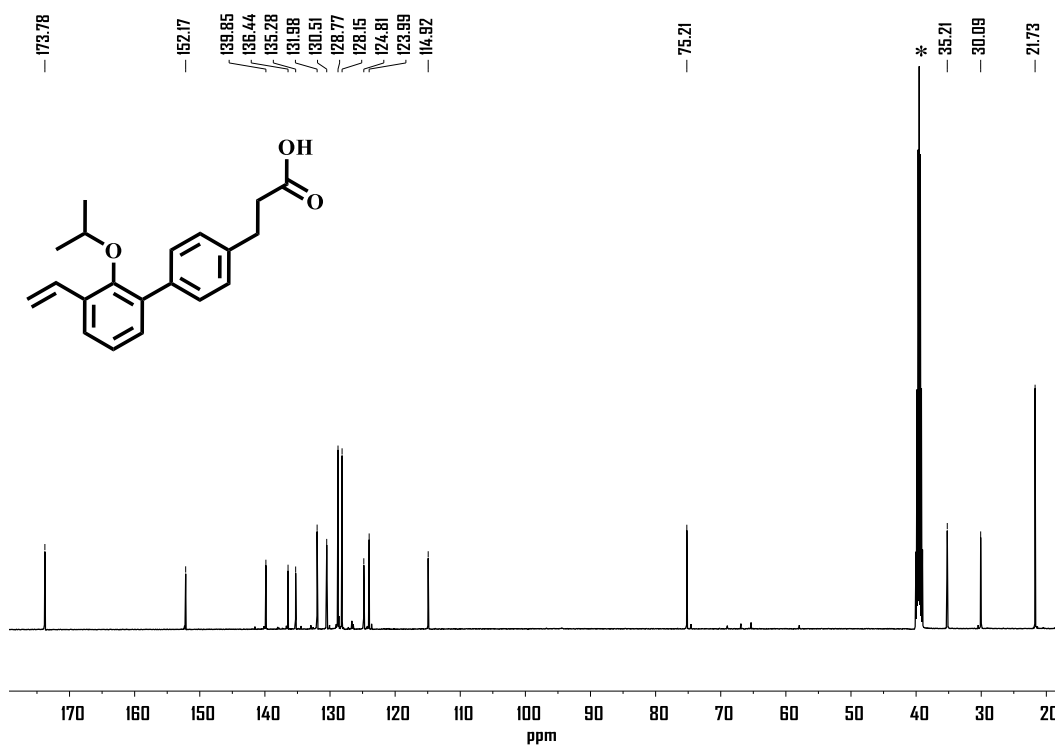

**Figure S10.** <sup>13</sup>C{<sup>1</sup>H} NMR spectrum (125 MHz) of complex E in DMSO-*d*<sub>6</sub> (\*) at 25 °C.



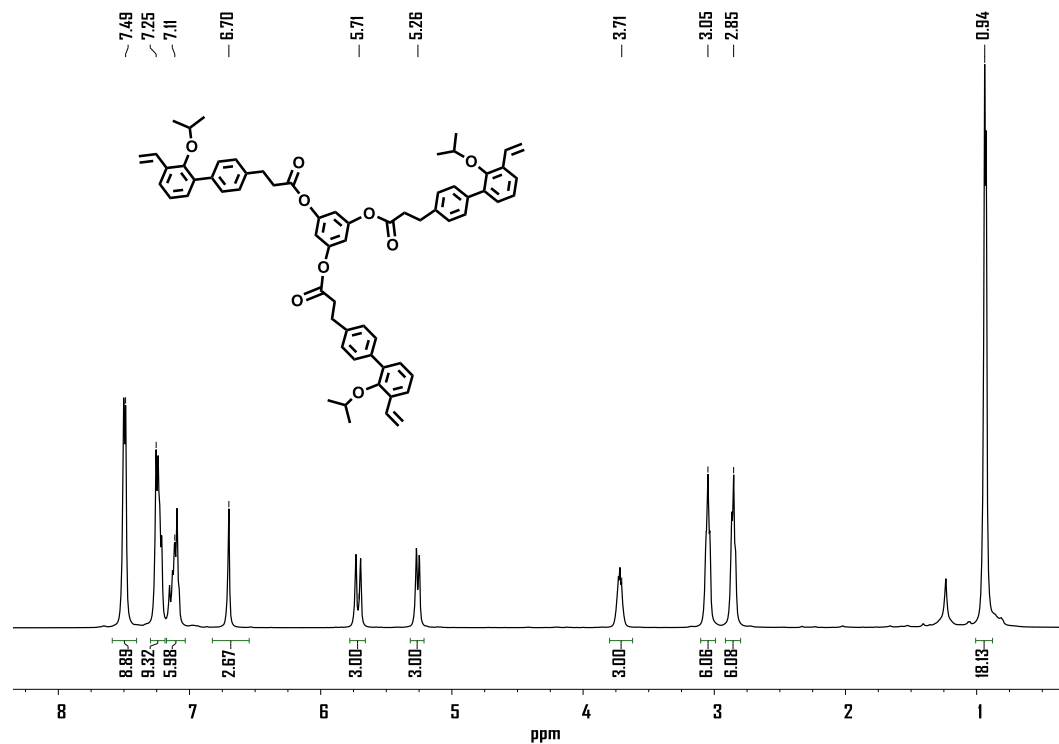

**Figure S11.**  $^1\text{H}$  NMR spectrum (500 MHz) of complex **F** in  $\text{CDCl}_3$  (\*) at 25 °C.

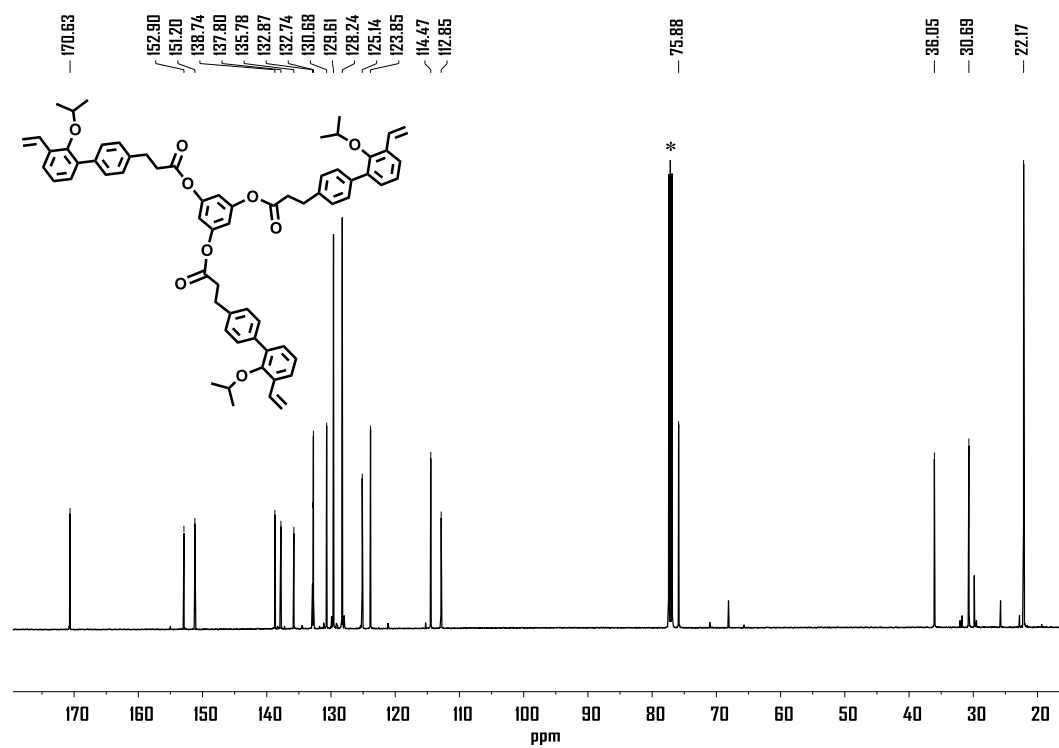

**Figure S12.**  $^{13}\text{C}\{^1\text{H}\}$  NMR spectrum (125 MHz) of complex **F** in  $\text{CDCl}_3$  (\*) at 25 °C.

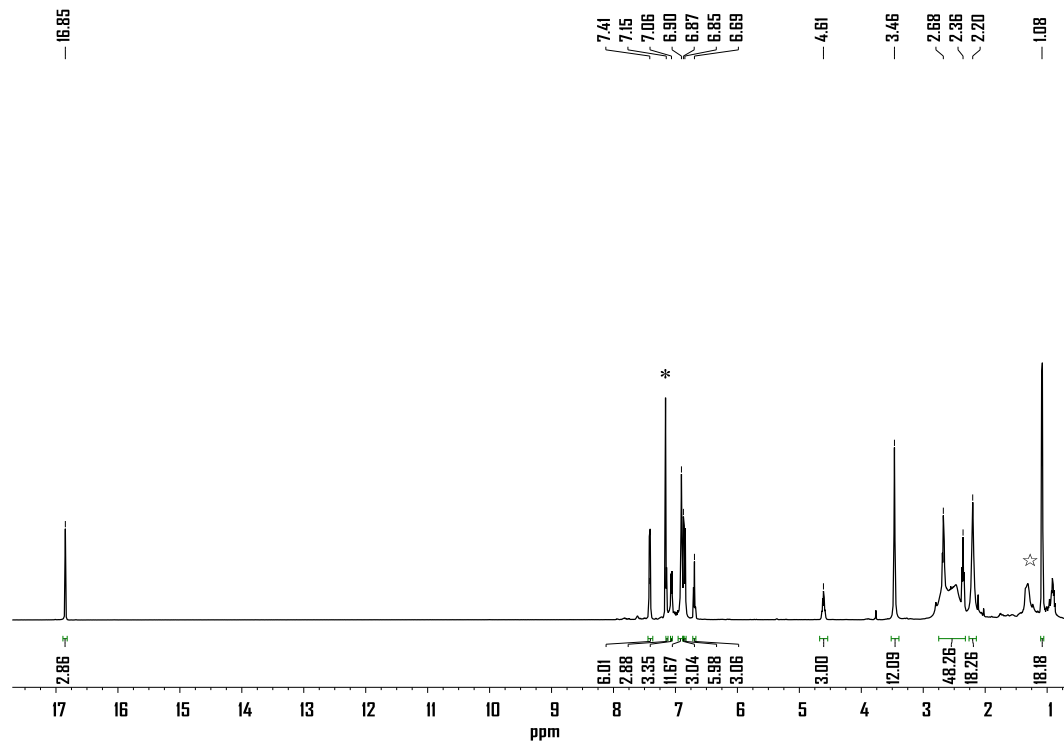

**Figure S13.**  $^1\text{H}$  NMR spectrum (500 MHz) of complex **IV** in  $\text{C}_6\text{D}_6$  (\*) at 25 °C. (\* Hexane).

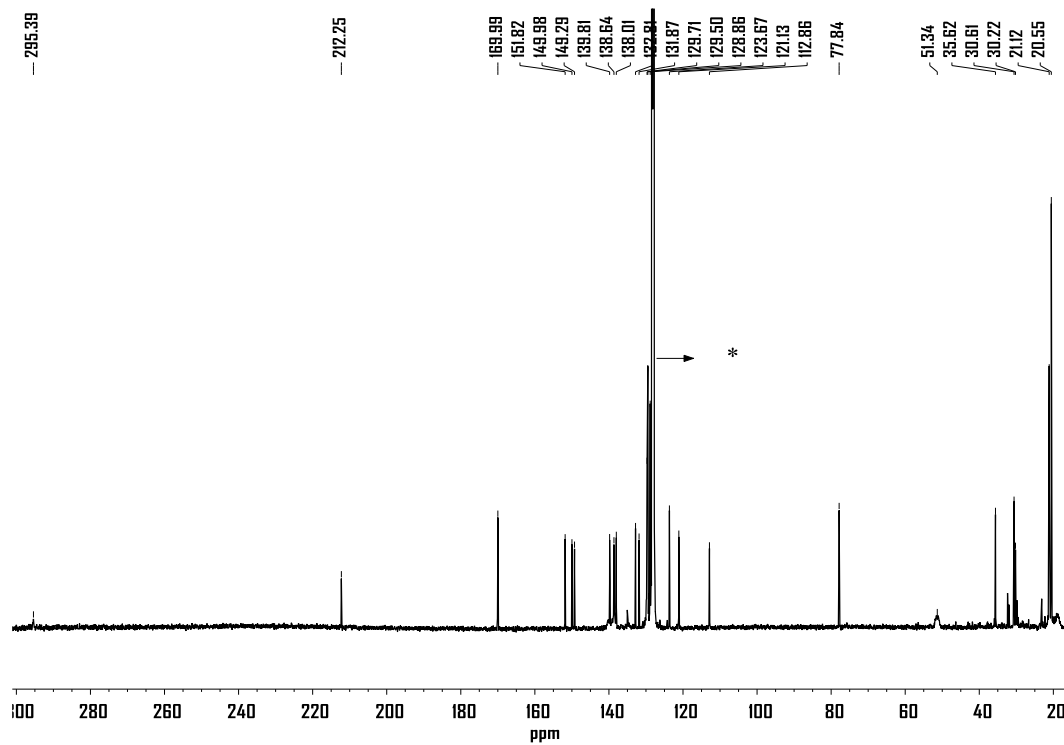

**Figure S14.**  $^{13}\text{C}\{^1\text{H}\}$  NMR spectrum (125 MHz) of complex **IV** in  $\text{C}_6\text{D}_6$  (\*) at 25 °C.

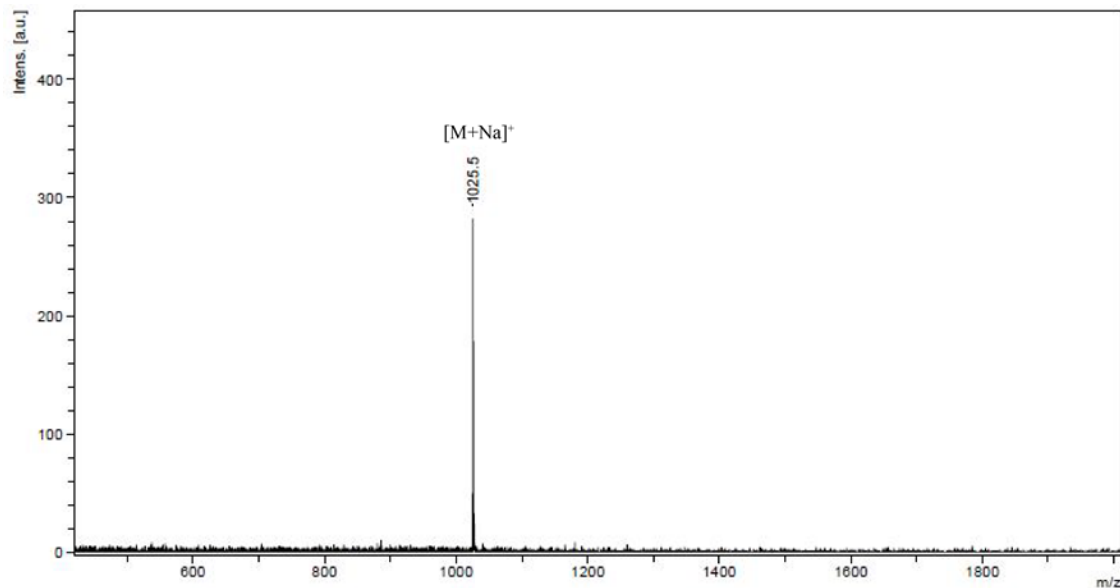

**Figure S15.** MALDI-TOF of complex F.

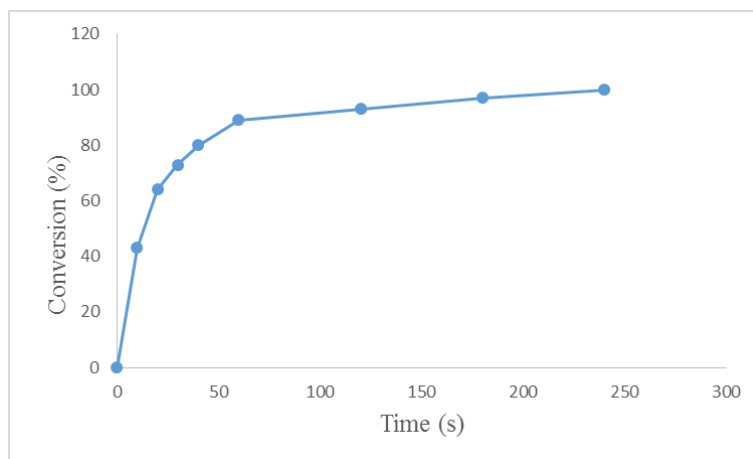

**Figure S16.** ROMP of monomer 1 in the presence of catalysts III. Conditions: Monomer/catalyst ratio 100:1, 0.3 mM (catalyst concentration) in toluene at room temperature. Conversion was determined by  $^1\text{H}$  NMR.

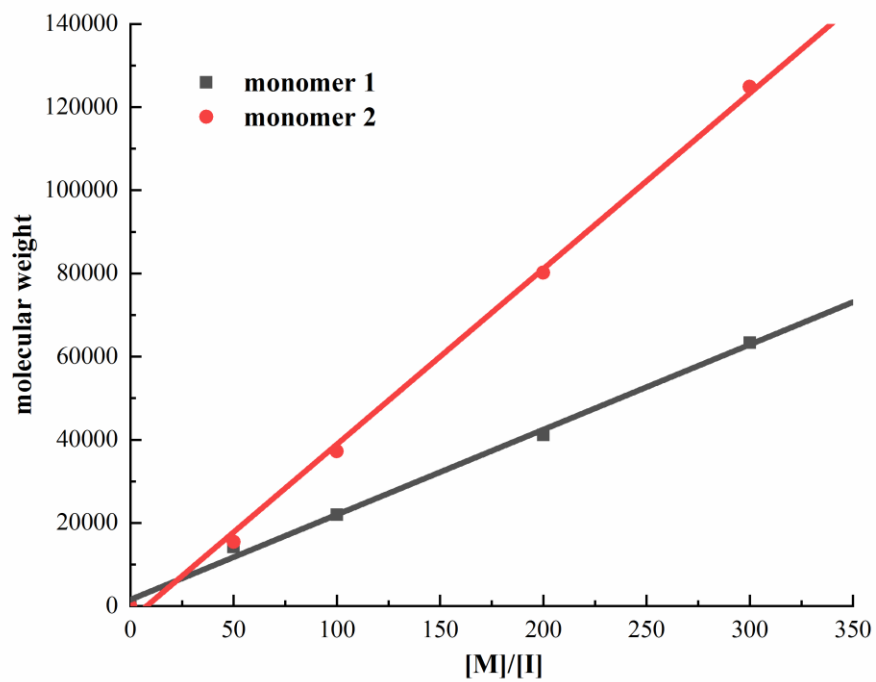

**Figure S17.**  $M_n$  versus  $M/I$  for the polymers produced from monomer **1** and **2** by using catalyst III.

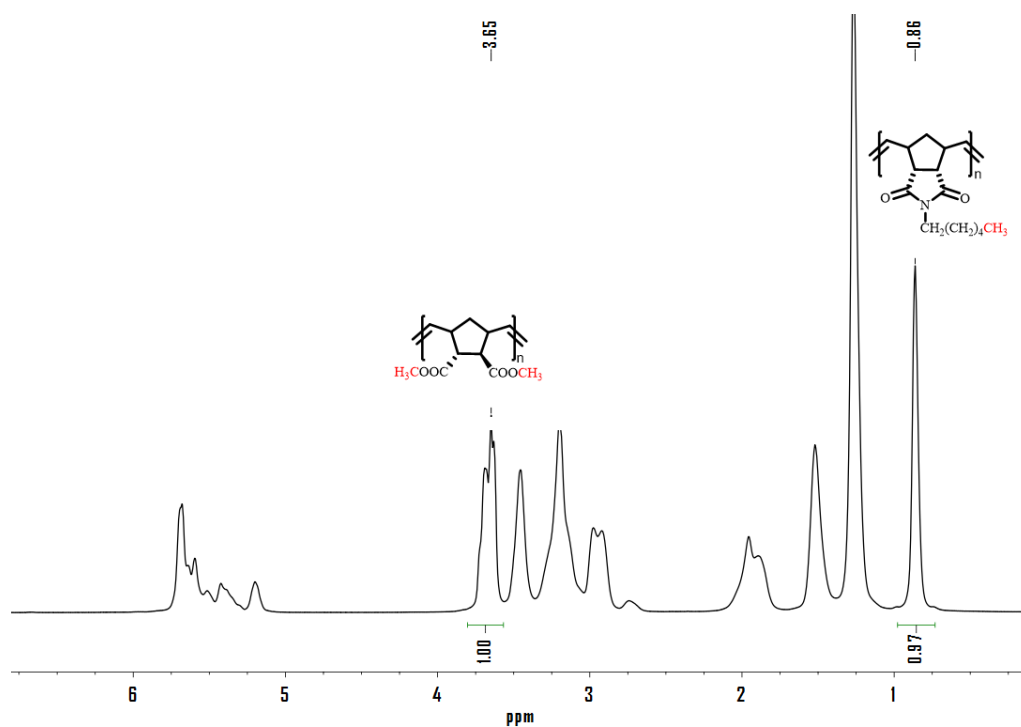

**Figure S18.**  $^1\text{H}$  NMR spectrum (500 MHz) of poly[(**1**)<sub>100</sub>-*b*-(**4**)<sub>200</sub>] in  $\text{CDCl}_3$  at 25 °C.

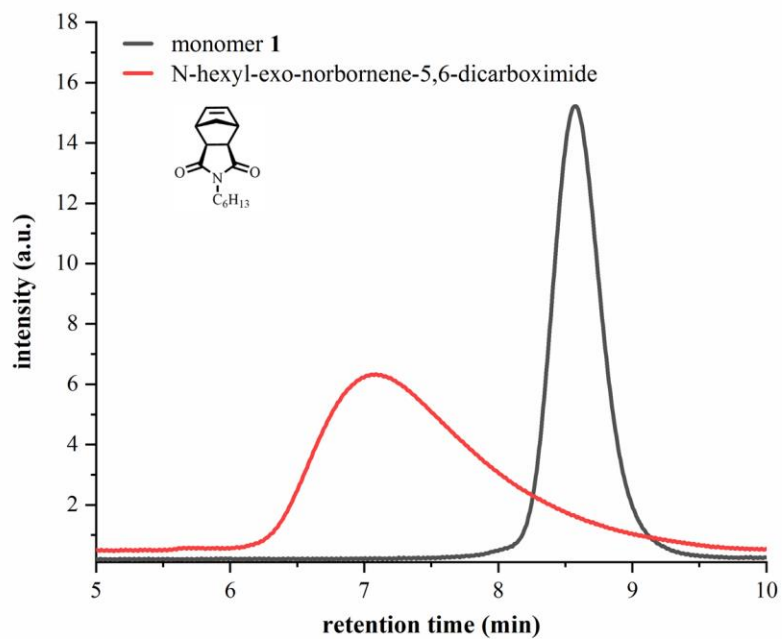

**Figure S19.** SEC traces of monomer **1** and N-hexyl-exo-norbornene-5, 6-dicarboximide

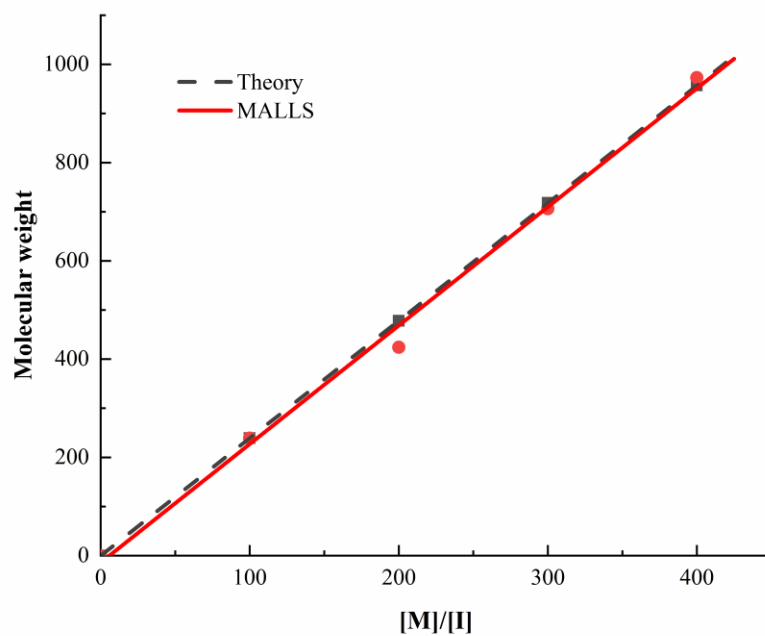

**Figure S20.** Plots of theoretical molecular weight and absolute molecular weight determined by MALLS-RI detector versus  $[M]/[I]$  for dendrimer **5** and using **IV** as catalyst.
